# Supplementary material for: A dizinc complex for selective fluorescence sensing of uridine and uridine-containing dinucleotides
Source: Royal Society of Chemistry journal article supplement (doi:10.1039/b617453a), 2007-01-01
Supplement: b617453a.pdf [file b617453a.pdf]

## Electronic Supporting Information

Page 2-3. Experimental details for potentiometric titrations, steady-state and time resolved fluorescence measurements and  $^1\text{H}$  NMR measurements

Page 4. Protonation constants of ligand L and  $\text{p}K_{\text{a}}$  of the substrates

Page 5. Stability constants of the  $\text{Zn(II)}$  complexes.

Page 6, Figure S1. Fluorescence emission spectra recorded on solutions containing UpU and complex **1** at selected pH values

Page 6, Figure S2. Fluorescence spectra recorded on solutions containing U and complex **1** at selected pH values

Page 7, Figure S3.  $^1\text{H}$  NMR spectra of uridine, deprotonated uridine, complex **1** and complex **1** in the presence of 2 eq. of uridine at different pH values.

Page 8, Figure S4. Fluorescence emission spectra recorded on solutions containing **1** and increasing amounts of UpA

Page 8, Figure S5. Fluorescence emission spectra recorded on solutions containing UpA and complex **1** at selected pH values.

Page 9, Figure S6. Emission intensity at 440 nm (●, right y axis) as a function of pH compared to the distribution curves of the complexes (solid curves, left y axis) for a system containing **1** and UpA ( $[\textbf{1}] = 2.5 \cdot 10^{-5} \text{ M}$ ,  $[\text{UpA}] = 1.25 \cdot 10^{-4} \text{ M}$ ,  $\lambda_{\text{exc}} = 290 \text{ nm}$ , 298.1 K).

Page 10, Figure S7. Fluorescence emission spectra of **1** in the presence of increasing amounts of 5'-AAUUA-3' (0.25 eq each addition) at pH 8.5. ( $[\textbf{1}] = 2.5 \cdot 10^{-5} \text{ M}$ ,  $\lambda_{\text{exc}} = 290 \text{ nm}$ , 298.1 K).

**Potentiometric measurements.** All the pH metric measurements ( $\text{pH} = -\log [\text{H}^+]$ ) were performed by using a water-thermostatted 5 ml titration vessel; the potentiometric titrations were carried out in degassed  $0.1 \text{ mol dm}^{-3} \text{ NMe}_4\text{NO}_3$  solutions, at 298.1 K by using the procedure which have been already described.<sup>1</sup> The combined Ingold 405 S7/120 electrode was calibrated as a hydrogen concentration probe by titrating known amounts of HCl with  $\text{CO}_2$ -free  $\text{NMe}_4\text{OH}$  solutions and determining the equivalent point by the Gran's method<sup>2</sup> which allows to determine the standard potential  $E^0$ , and the ionic product of water ( $\text{p}K_w = 13.83(1)$  at 298.1 K in  $0.1 \text{ mol dm}^{-3} \text{ NMe}_4\text{NO}_3$ ). All equilibria involved in the studied systems were determined under the present experimental conditions in order to obtain a consistent set of data. Protonation constants of L ligands and substrates, formation constants of dinuclear Zn(II) complexes with L and formation constant of the UpU, UpA and U ternary complexes are supplied in Tables S1 and S2. The formation constants of the binary Zn(II) complexes with L have been previously determined in 0.1 M  $\text{NMe}_4\text{Cl}$  at 298.1 K.<sup>1</sup> The low solubility of the UpU complexes in this ionic medium lead us to study Zn(II) complexation in a different ionic medium ( $\text{NMe}_4\text{NO}_3$  0.1 M, 298.1 K). The stability of the Zn(II) complexes with L, however, are very similar to that previously reported.<sup>1</sup> In the experiments to determine the stability of the Zn(II) complexes with L the ligand concentration was  $5 \times 10^{-4} \text{ mol dm}^{-3}$ , while the Zn(II) concentration was varied in the range  $5 \times 10^{-4} - 1 \times 10^{-3} \text{ mol dm}^{-3}$ . In the experiments to determine the formation constants of the complexes with nucleosides or ribodinucleotides, L and Zn(II) concentrations were  $5 \times 10^{-4}$  and  $1 \times 10^{-3}$ , respectively, while the concentration of the substrates was varied from  $5 \times 10^{-4}$  to  $5 \times 10^{-3}$ . At least three measurements (about 150 data points each one) were performed for each system in the pH range 2.5-10.5 and the relevant e.m.f. data were treated by means of the computer program HYPERQUAD<sup>3</sup> which furnished the relevant equilibrium constants reported in Table S1 and S2.

**Spectrofluorimetric measurements.** UV-vis and steady state fluorescence emission spectra were recorded respectively on a Perkin-Elmer Lambda 25 and LS-55 spectrometers at 298.1 K. 0.01 M  $\text{HNO}_3$  and  $\text{NMe}_4\text{OH}$  solutions were used to adjust the pH, which was measured on a Metrohm 713 pH meter.

Measurements of the fluorescence decay lifetimes were carried out by utilizing ultrashort pulses (duration  $\approx 100 \text{ fs}$  at 1 KHz repetition rate) from a regenerative amplifier Ti:sapphire laser system equipped with an optical parametric generator and amplifier (OPG-OPA). Non-linear sum frequency and second harmonic generation in BBO crystals provide tunable light pulses in the 240 to 800 nm spectral range<sup>5</sup>. The fluorescence was collected by a quartz lens and focused onto the photocathode of a Hamamatsu R2809U-microchannel plate photomultiplier after passing through a

proper set of coloured filters. The selected spectral intervals are: 300-375nm, 410-470 nm and 500-575 (FWHH). The output of the photomultiplier was amplified and connected to the 50  $\Omega$  input of a digital oscilloscope (LeCroy Mod.9370M 1 GHz band pass). The very reproducible instrumental function, obtained by measuring the light scattering from a latex solution, resulted slightly asymmetric with a time duration (FWHH) of 950 ps. The experimental fluorescence signals are treated in a deconvolution/fitting process and are reproduced by a single or dual-exponential function.

**<sup>1</sup>H NMR measurements.** <sup>1</sup>H NMR spectra in D<sub>2</sub>O solutions at different pH values were recorded at 298 K in a Varian 300 MHz spectrometer. In the NMR titrations small amounts of 0.01 M NaOD or DCl solutions were used to adjust the pD. The pH was calculated from the measured pD values using the relationship:  $\text{pH} = \text{pD} - 0.40^4$

- (1) Lodeiro, C.; Parola, A. J.; Pina, F.; Bazzicalupi C.; Bencini, A.; Bianchi A.; Masotti, A.; Giorgi, C.; Valtancoli B. *Inorg. Chem.*, **2001**, *40*, 2968-2975.
- (2) Gran, G. *Analyst* (London), **1952**, *77*, 661. Rossotti F. J.; H. Rossotti, *J. Chem. Educ.* **1965**, *42*, 375.
- (3) Gans, P.; Sabatini, A.; Vacca, A. *Talanta*, **1996**, *43*, 807-812.
- (4) Covington, A. K.; Paabo, M.; Robinson R. A.; Bates, R. G. *Anal. Chem.* **1968**, *40*, 700
- (5) Neuwahl, F.V.R.; Bussotti, L.; Foggi, P. *Res. Adv. In Photochem & photobiol.*; **2000**, *1*, 77-93.

**Table S1.** Protonation constants of ligand L and  $pK_a$  of the substrates (NMe<sub>4</sub>NO<sub>3</sub> 0.1 M, 298.1 K)

| Equilibrium                       | Log K                |
|-----------------------------------|----------------------|
| $L + H^+ = [HL]^+$                | 9.40(1) <sup>a</sup> |
| $[HL]^+ + H^+ = [H_2L]^{2+}$      | 8.6(1)               |
| $[H_2L]^{2+} + H^+ = [H_3L]^{3+}$ | 7.43(1)              |
| $[H_3L]^{3+} + H^+ = [H_4L]^{4+}$ | 4.12(1)              |
| $[H_4L]^{4+} + H^+ = [H_5L]^{5+}$ | 2.19(2)              |

  

| substrate     | $pK_a$ <sup>b</sup>  |
|---------------|----------------------|
| Uridine (U)   | 9.29(1) <sup>c</sup> |
| Guanidine (G) | 9.19(1) <sup>c</sup> |
| Adenosine (A) | 3.60(1) <sup>c</sup> |
| Citidine (C)  | 4.22(1) <sup>c</sup> |

  

| Substrate | $pK_{a1}$ <sup>d</sup> | $pK_{a2}$ <sup>d</sup> |
|-----------|------------------------|------------------------|
| UpU       | 9.62(1) <sup>e</sup>   | 9.31(1)                |
| GpG       | 9.59(1) <sup>e</sup>   | 9.27(1)                |
| ApA       | 3.78(1) <sup>e</sup>   | 3.10(1)                |
| CpC       | 4.53(1) <sup>e</sup>   | 3.71(1)                |
| UpA       | 9.4(1)                 | 4.6(1)                 |

<sup>a</sup>: the values are very similar to those previously determined in 0.1 M NMe<sub>4</sub>Cl (see Lodeiro, C.; Parola, A. J.; Pina, F.; Bazzicalupi C.; Bencini, A.; Bianchi A.; Masotti, A.; Giorgi, C.; Valtancoli B. *Inorg. Chem.*, **2001**, *40*, 2968-2975. <sup>b</sup>: in the case of U and G the  $pK_a$  values are referred to deprotonation of the substrate, i. e., to the equilibria  $X(H_{-1})^- + H^+ = X$  ( $X = U$  or  $G$ ), while in the case of cytidine and adenosine are related to protonation of the substrate, i. e. to equilibria of the type  $X + H^+ = XH^+$  ( $X = A$  or  $C$ ). <sup>c</sup>: the values are in good agreement with those previously reported (for uridine see: Nagy, Z; Sovago, I, *Dalton Trans*, **2001**, 2467; for guanosine, cytidine and adenosine see: Taylor, S.; Buncel, E.; Norris, A.; *J. Inorg. Biochem.*, **1981**, *15*, 131). <sup>d</sup> in the case of UpU and GpG the  $pK_{a1}$  and  $pK_{a2}$  values are referred to deprotonation of the substrate, i. e., to the equilibria  $X(H_{-2})^{3-} + H^+ = X(H_{-1})^{2-}$  and  $X(H_{-1})^{2-} + H^+ = X^-$  ( $X = UpU$  or  $GpG$ ), while in the case of CpC and ApA are related to protonation of the substrate, i. e. to equilibria of the type  $X + H^+ = XH^+$  and  $XH^+ + H^+ = XH_2^{2+}$  ( $X = ApA$  or  $CpC$ ). In the case of UpA the  $pK_{a1}$  value is related to deprotonation of the substrate, while the  $pK_{a2}$  value refers to protonation of the substrate. <sup>e</sup>: the values are in good agreement with those previously reported by Ogasawara N; Inoue, Y, *J. Am. Chem. Soc.*, **1976**, *98*, 7048.

**Table S2.** Stability constants of the Zn(II) complexes (log K) with L (NMe<sub>4</sub>NO<sub>3</sub> 0.1M, 298.1 K)<sup>a</sup>

| Reaction                                                                             | Log K    |
|--------------------------------------------------------------------------------------|----------|
| $L + Zn^{2+} = [ZnL]^{2+}$                                                           | 12.12(1) |
| $[ZnL]^{2+} + H^+ = [ZnLH]^{3+}$                                                     | 6.91(1)  |
| $[ZnLH]^{3+} + H^+ = [ZnLH_2]^{4+}$                                                  | 5.08(2)  |
| $[ZnL]^{2+} + OH^- = [ZnL(OH)]^+$                                                    | 2.94(1)  |
| $[ZnL(OH)]^+ + OH^- = [ZnL(OH)_2]$                                                   |          |
| $L + 2Zn^{2+} = [Zn_2L]^{4+}$                                                        | 17.62(5) |
| $[Zn_2L]^{4+} + OH^- = [Zn_2L(OH)]^{3+}$                                             | 5.69(6)  |
| $[Zn_2L(OH)]^{3+} + OH^- = [Zn_2L(OH)_2]^{2+}$                                       | 5.64(6)  |
| $[Zn_2L]^{4+} + UpU(H_{-1})^{2-} = [Zn_2L \cdot UpU(H_{-1})]^{2+}$                   | 8.0(1)   |
| $[Zn_2L \cdot UpU(H_{-1})]^{2+} = [Zn_2L \cdot UpU(H_{-2})]^+ + H^+$                 | -8.1(1)  |
| $[Zn_2L]^{4+} + U(H_{-1})^- = [Zn_2L \cdot U(H_{-1})]^{3+}$                          | 8.1(1)   |
| $[Zn_2L \cdot U(H_{-1})]^{3+} + U(H_{-1})^- = [Zn_2L \cdot U(H_{-1})_2]^{2+}$        | 7.2(1)   |
| $[Zn_2L]^{4+} + UpA(H_{-1})^{2-} = [Zn_2L \cdot UpA(H_{-1})]^{2+}$                   | 6.1(1)   |
| $[Zn_2L \cdot UpA(H_{-1})]^{2+} + UpA(H_{-1}) = [Zn_2L \cdot UpA(H_{-2})_2]^+ + H^+$ | 4.9(1)   |

<sup>a</sup>: the stability of the binary complexes between Zn(II) and L, previously determined in 0.1 M NMe<sub>4</sub>Cl at 298.1 K (Lodeiro, C.; Parola, A. J.; Pina, F.; Bazzicalupi C.; Bencini, A.; Bianchi A.; Masotti, A.; Giorgi, C.; Valtancoli B. *Inorg. Chem.*, **2001**, *40*, 2968-2975), have been determined again in the course of the present study in a different ionic medium (0.1 M NMe<sub>4</sub>NO<sub>3</sub>, 298.1 K), due to the low solubility of the UpU complexes in 0.1 M NMe<sub>4</sub>Cl. The constant values, however, are in good accord to that previously reported.

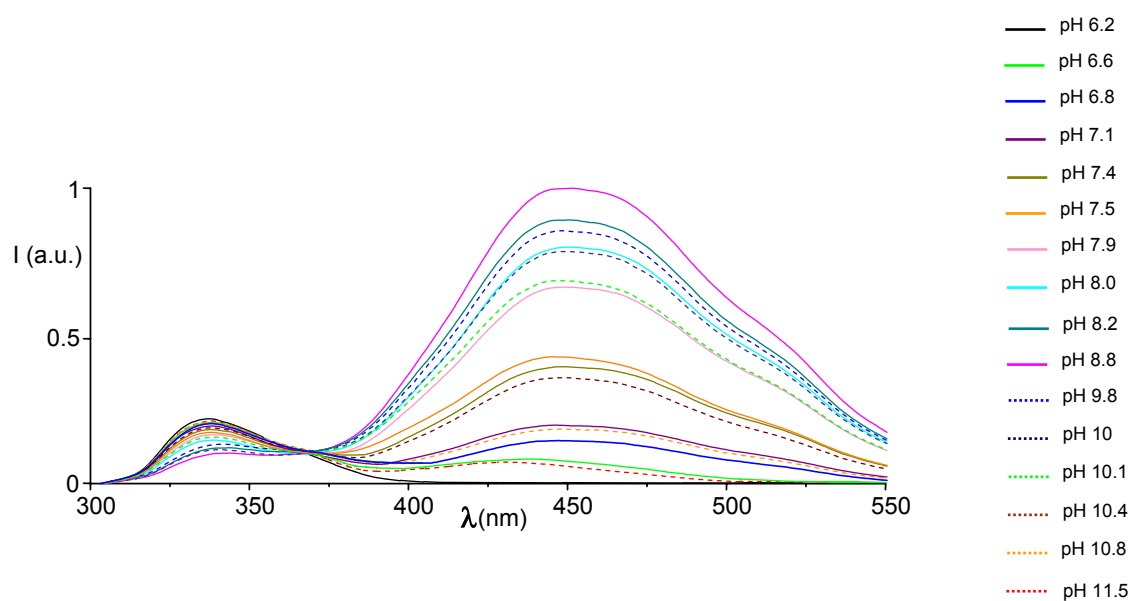

**Figure S1.** Fluorescence emission spectra recorded on solutions containing UpU and complex **1** at selected pH values ( $[UpU] = [1] = 2.5 \times 10^{-5} M$ ,  $\lambda_{exc} = 290 \text{ nm}$ ,  $T = 298 \text{ K}$ ).

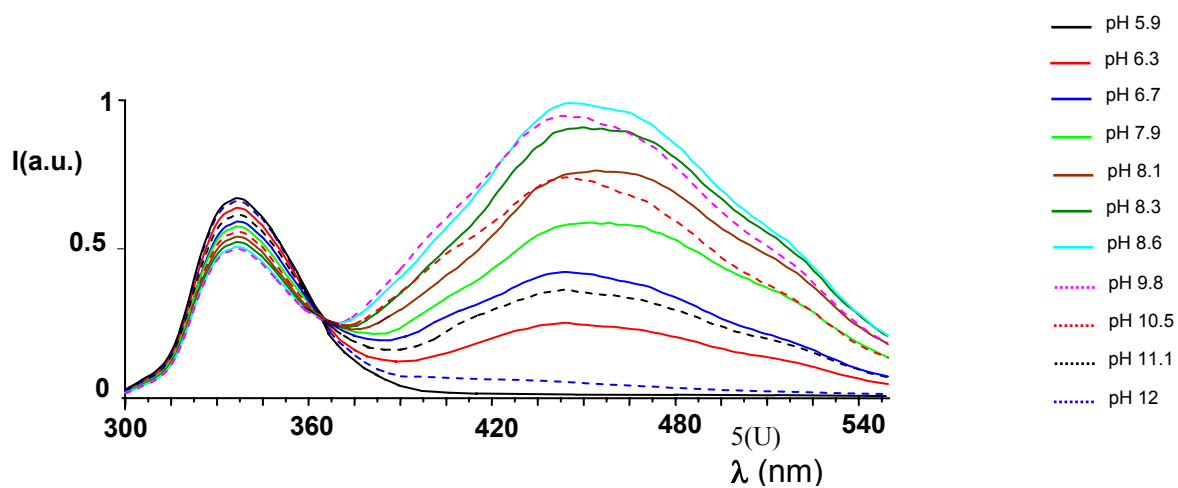

**Figure S2.** Fluorescence spectra recorded on solutions containing U and complex **1** at selected pH values ( $[1] = [U] = 2.5 \cdot 10^{-5} M$ ,  $[U] = 5 \cdot 10^{-5} M$ ,  $\lambda_{exc} = 290 \text{ nm}$ ,  $T = 298.1 \text{ K}$ ).

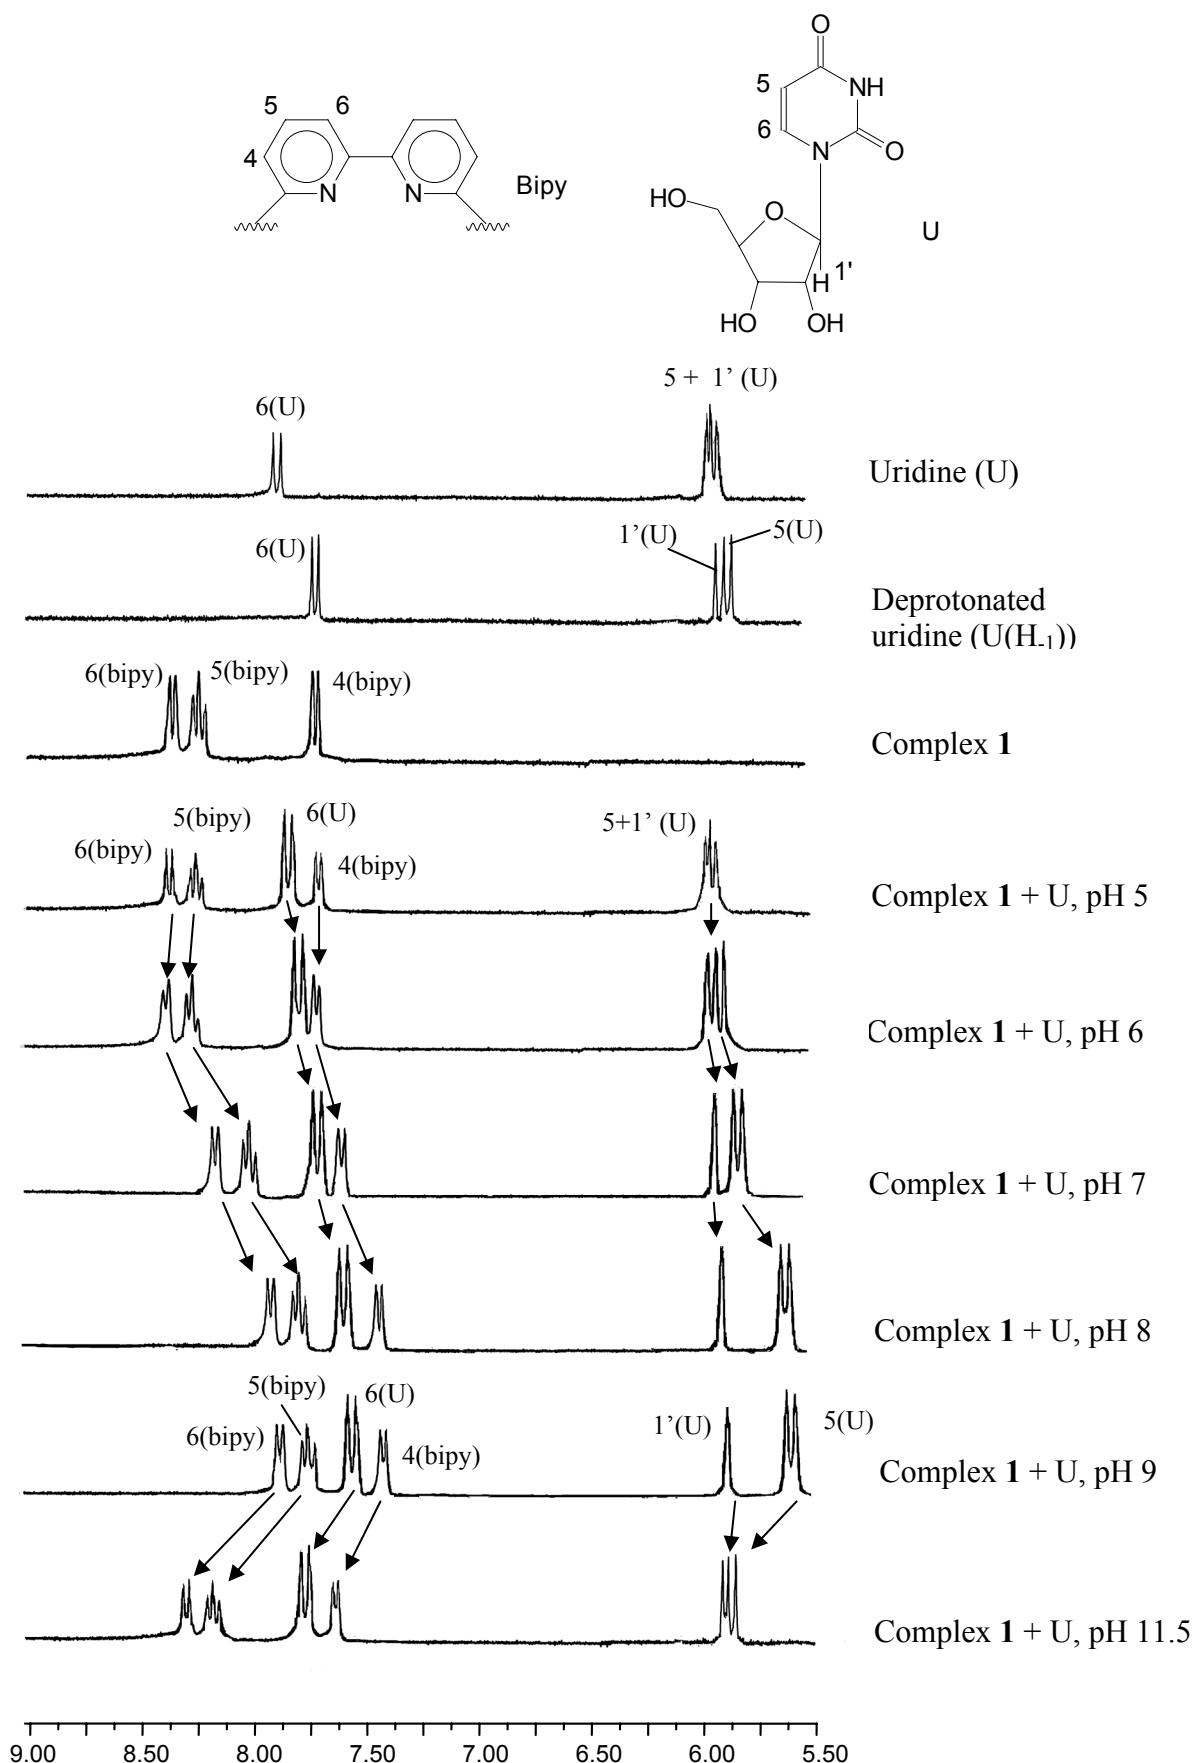

**Figure S3.** <sup>1</sup>H NMR spectra of uridine, deprotonated uridine, complex **1** and complex **1** in the presence of 2 eq. of uridine at different pH values at 318 K (the spectra of complex **1** in the presence of uridine display fluxionality at lower T values, avoiding a correct interpretation). The observed downfield shift of the <sup>1</sup>H signals of the nucleobase and dipyridine at pH 11.5 is due to hydroxide binding to complex **1**, which leads to detachment of the nucleoside from the dimetal complex.

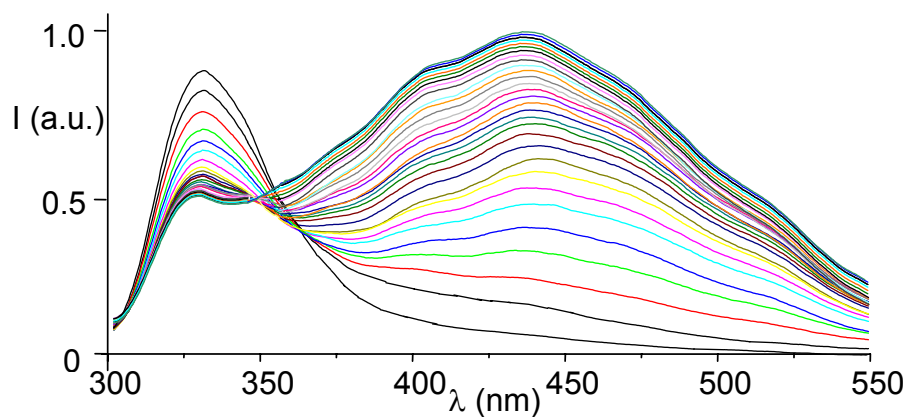

**Figure S4.** Fluorescence emission spectra of **1** in the presence of increasing amounts of UpA (0.2 eq each addition) at pH 9. ( $[1] = 2.5 \cdot 10^{-5}$  M,  $\lambda_{\text{exc}} = 290$  nm, 298.1 K).

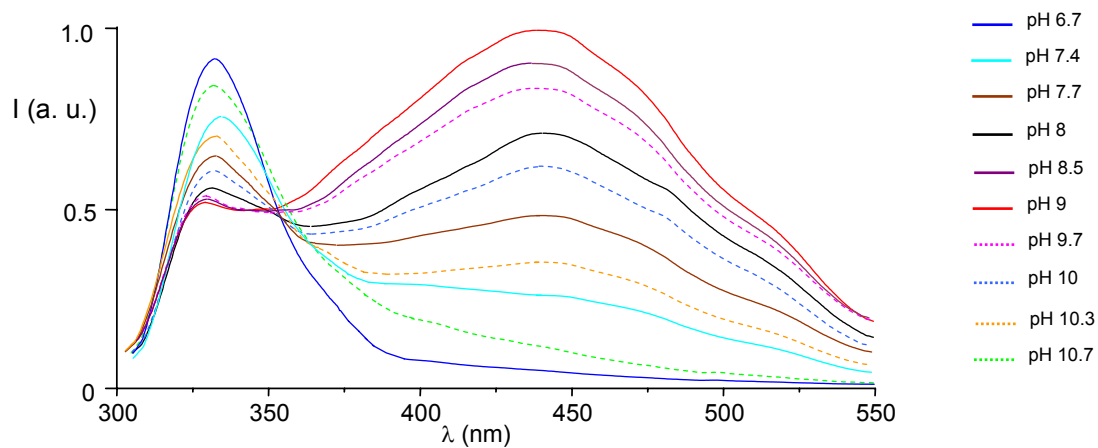

**Figure S5.** Fluorescence emission spectra recorded on solutions containing UpA and complex **1** at selected pH values ( $[\text{UpA}] = 1,25 \times 10^{-4}$ ,  $[1] = 2.5 \times 10^{-5}$  M,  $\lambda_{\text{exc}} = 290$  nm,  $T = 298$  K).

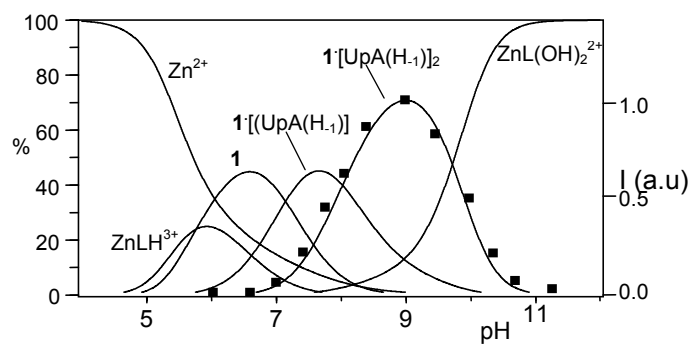

**Figure S6.** Emission intensity at 440 nm (●, right y axis) as a function of pH compared to the distribution curves of the complexes (solid curves, left y axis) for a system containing **1** and UpA ( $[1] = 2.5 \cdot 10^{-5}$  M,  $[UpA] = 1.25 \cdot 10^{-4}$  M,  $\lambda_{exc} = 290$  nm, 298.1 K).

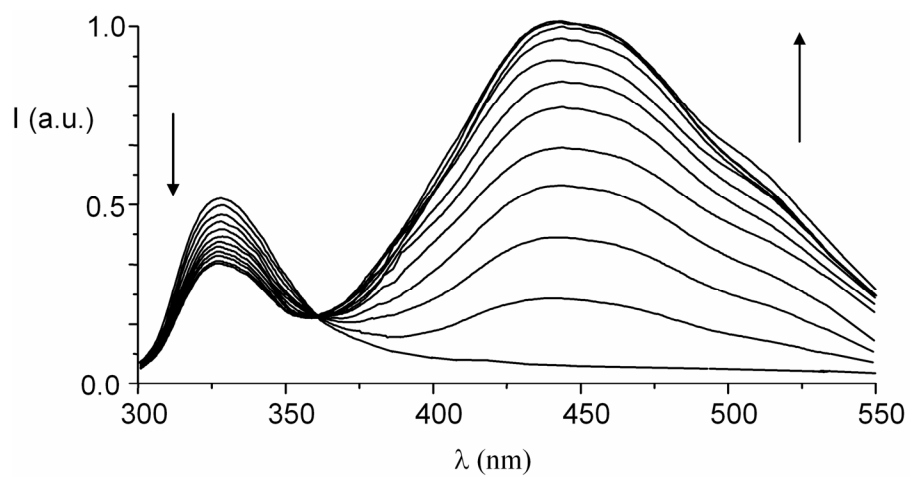

**Figure S7.** Fluorescence emission spectra of **1** in the presence of increasing amounts of 5'-AAUUAA-3' (0.25 eq each addition) at pH 8.5. ( $[1] = 2.5 \cdot 10^{-5}$  M,  $\lambda_{\text{exc}} = 290$  nm, 298.1 K).
